# Supplementary material
Source: HighWire-hosted journal article supplement (http://www.cmaj.ca/highwire/filestream/81160/field_highwire_adjunct_files/0/220011-five-1-at.pdf)
Supplement: 220011-five-1-at.pdf [file 220011-five-1-at.pdf]

**Appendix: Tables of pharmacokinetic and pharmacodynamic drug interactions with fluvoxamine. These lists are not exhaustive but highlight clinically relevant interactions for select medications.**

Table 1: Pharmacokinetic Interactions with Fluvoxamine<sup>1,2</sup>

| Cytochrome p450 isoform | Strength of inhibition | Example substrates and adverse effects                                                                                                                                                                                                                                                                                                                                                                                                                                                                                                                                                                                                                                                                                                              |
|-------------------------|------------------------|-----------------------------------------------------------------------------------------------------------------------------------------------------------------------------------------------------------------------------------------------------------------------------------------------------------------------------------------------------------------------------------------------------------------------------------------------------------------------------------------------------------------------------------------------------------------------------------------------------------------------------------------------------------------------------------------------------------------------------------------------------|
| 1A2                     | Strong                 | <ul style="list-style-type: none"> <li>• Tizanidine – can result in profound hypotension and QTc prolongation. Use is contraindicated.</li> <li>• Caffeine – can increase serum caffeine concentration. Advised to limit intake to 1 serving per day.</li> <li>• Clozapine – monitor for toxicity; consider dose reduction to one-third of original dose.</li> <li>• Theophylline – monitor for toxicity; dosage reduction may be required.</li> <li>• Mexiletine – monitor for toxicity; dosage reduction may be required.</li> <li>• Propranolol – monitor blood pressure and heart rate; dosage reduction may be required.</li> <li>• R-warfarin – can result in increased warfarin activity; INR monitoring required every 3-5 days.</li> </ul> |
| 2C19                    | Strong                 | <ul style="list-style-type: none"> <li>• Clopidogrel – reduces biotransformation of clopidogrel to its active metabolite. May reduce efficacy.</li> <li>• Phenytoin – monitor for toxicity; check serum concentration after 5-7 days; dosage reduction may be required.</li> <li>• Diazepam – monitor for toxicity; consider dosage reduction or switch to a lorazepam/oxazepam</li> </ul>                                                                                                                                                                                                                                                                                                                                                          |
| 2C9                     | Moderate               | <ul style="list-style-type: none"> <li>• S-warfarin – can result in increased warfarin activity; INR monitoring required every 3-5 days.</li> </ul>                                                                                                                                                                                                                                                                                                                                                                                                                                                                                                                                                                                                 |
| 3A4                     | Moderate               | <ul style="list-style-type: none"> <li>• Carbamazepine – monitor for toxicity; check serum concentration after 5-7 days; dosage reduction may be required.</li> <li>• Methadone – monitor for toxicity; encourage weekly follow-up with prescriber for dosage adjustments.</li> <li>• Cyclosporine – monitor for toxicity; check serum concentration after 5-7 days; dosage reduction may be required.</li> <li>• Alprazolam – monitor for toxicity; consider dosage reduction or switch to lorazepam/oxazepam.</li> <li>• R-warfarin – can result in increased warfarin activity; INR monitoring required every 3-5 days.</li> </ul>                                                                                                               |

Table 2: Pharmacodynamic Interactions with Fluvoxamine<sup>1,2</sup>

| Adverse Effects             | Concurrent Medications                                                                                                                                                                                                                                                                                                                                                                                                                         |
|-----------------------------|------------------------------------------------------------------------------------------------------------------------------------------------------------------------------------------------------------------------------------------------------------------------------------------------------------------------------------------------------------------------------------------------------------------------------------------------|
| Serotonin toxicity          | <ul style="list-style-type: none"> <li>• Serotonin reuptake inhibitors</li> <li>• Tricyclic antidepressants</li> <li>• Methadone</li> <li>• Tramadol</li> <li>• Fentanyl</li> <li>• Meperidine</li> <li>• Lithium</li> <li>• St. John's Wort</li> <li>• Monoamine oxidase inhibitor e.g. linezolid, methylene blue, phenelzine*</li> </ul> <p>*Monoamine oxidase inhibitor use concurrently or within the last 14 days is contraindicated.</p> |
| QTc prolongation            | <ul style="list-style-type: none"> <li>• Thioridazine*</li> <li>• Mesoridazine*</li> <li>• Pimozide*</li> <li>• Tizanidine*</li> <li>• Methadone</li> </ul> <p>*Use with any of these agents is contraindicated.</p>                                                                                                                                                                                                                           |
| Increased bleeding risk     | <ul style="list-style-type: none"> <li>• Antiplatelets</li> <li>• Anticoagulants</li> <li>• Non-steroidal anti-inflammatory drugs</li> </ul>                                                                                                                                                                                                                                                                                                   |
| Decreased seizure threshold | <ul style="list-style-type: none"> <li>• Antidepressants</li> <li>• Antipsychotics</li> <li>• Tramadol</li> </ul>                                                                                                                                                                                                                                                                                                                              |

References:

1. Product monograph. Luvox (Fluvoxamine). Etobicoke, Ontario: BGP Pharma ULC, July 6, 2016.
2. Fluvoxamine. In: Lexi-Drugs Online [database on the Internet]. Hudson (OH): Lexicomp Inc.: 2022 [updated 07 Dec 2021; cited 08 Jan 2022]. Available from: <http://online.lexi.com>.
